# Supplementary material for: Antibacterial and Anti-Inflammatory Activities of Thymus vulgaris Essential Oil Nanoemulsion on Acne Vulgaris
Source: MDPI journal article supplement (doi:10.3390/microorganisms10091874), 2022-09-19
Supplement: s1 [file s1]

## Supplementary material

**Table S1.** GC-MS analysis of volatile compounds in tea tree EO

| Compound                      | Tea tree EO Content<br>(%) | Retention Time<br>(minutes) | Retention<br>Index |
|-------------------------------|----------------------------|-----------------------------|--------------------|
| $\alpha$ -Pinene              | 0.43                       | 7.294                       | 918.1              |
| Terpinolene                   | 1.51                       | 9.793                       | 1068               |
| <i>o</i> -Cymene              | 4.01                       | 10.06                       | 1085               |
| Eucalyptol                    | 3.25                       | 10.25                       | 1098               |
| $\gamma$ -Terpinen            | 16.70                      | 11.16                       | 1162               |
| $\alpha$ -Terpinolene         | 1.41                       | 12.04                       | 1224.8             |
| 4-Terpinenyl acetate          | 66.82                      | 14.93                       | 1456               |
| $\alpha$ -Terpineol           | 2.06                       | 15.24                       | 1481               |
| Alloaromadendrene             | 0.68                       | 22.3                        | 1883               |
| Aromadendrene                 | 0.40                       | 23.78                       | 1960               |
| Total identified<br>compounds |                            | 97.27%                      |                    |
| Phenolic compounds            |                            | 72.13%                      |                    |
| Terpenoid compounds           |                            | 25.14%                      |                    |

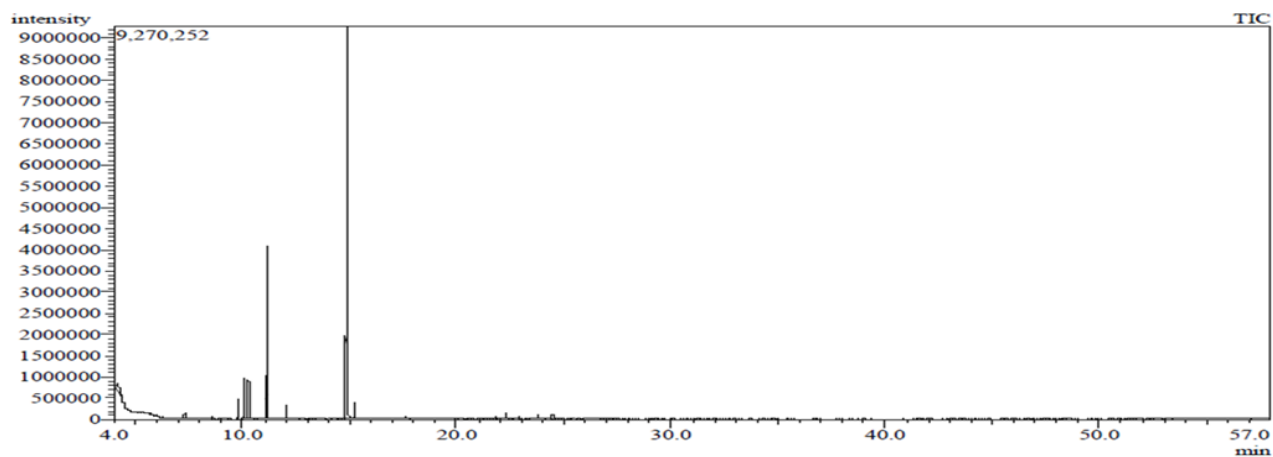

**Figure S1.** GC-MS Chromatogram of tea tree EO

**Table S2.** GC-MS analysis of volatile compounds in clove EO

| Compound                   | Clove EO Content (%) | Retention Time (minutes) | Retention Index |
|----------------------------|----------------------|--------------------------|-----------------|
| Isoeugenol                 | 1.70                 | 20.175                   | 1772            |
| Eugenol                    | 78.61                | 20.334                   | 1781            |
| Caryophyllene              | 11.94                | 21.799                   | 1857            |
| Humulene                   | 1.71                 | 22.694                   | 1904            |
| $\sigma$ -Cardinene        | 0.56                 | 24.473                   | 1996.7          |
| Eugenyl acetate            | 1.07                 | 24.59                    | 2003.4          |
| Caryophyllene oxide        | 1.01                 | 26.031                   | 2037.9          |
| Total identified compounds |                      | 96.6%                    |                 |
| Phenolic compounds         |                      | 81.38%                   |                 |
| Terpenoid compounds        |                      | 15.22%                   |                 |

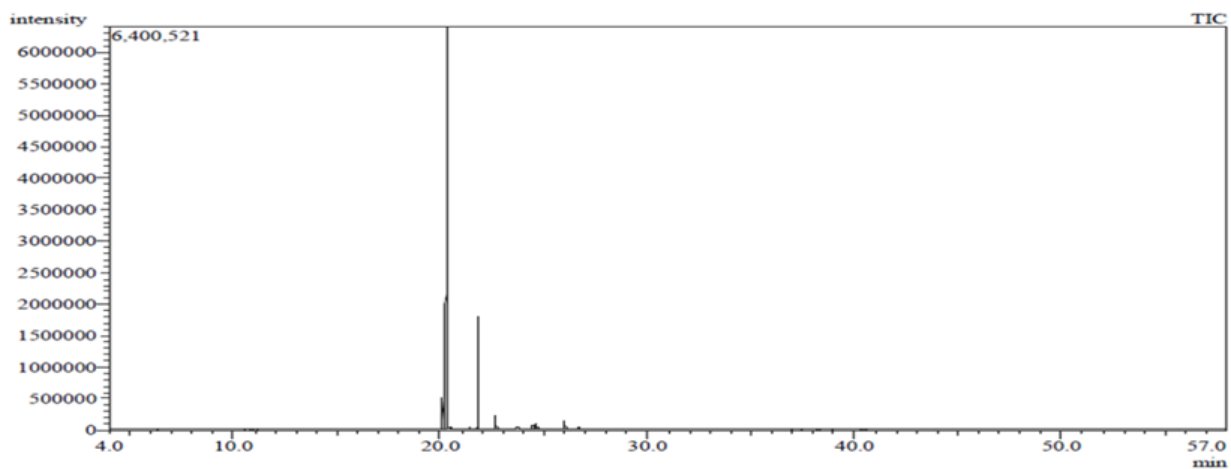**Figure S2.** GC-MS Chromatogram of clove EO

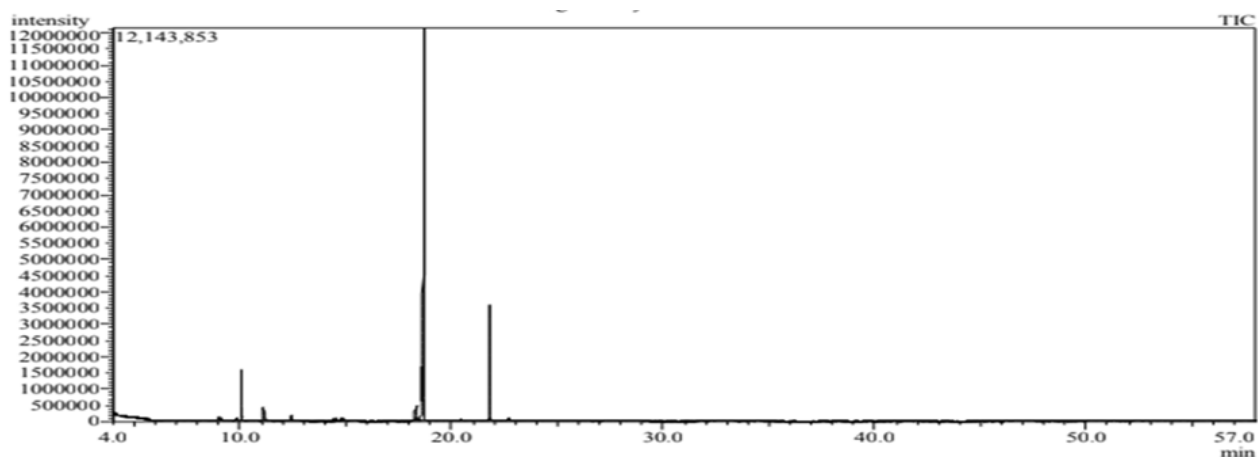

**Figure S3.** GC-MS Chromatogram of thyme EO

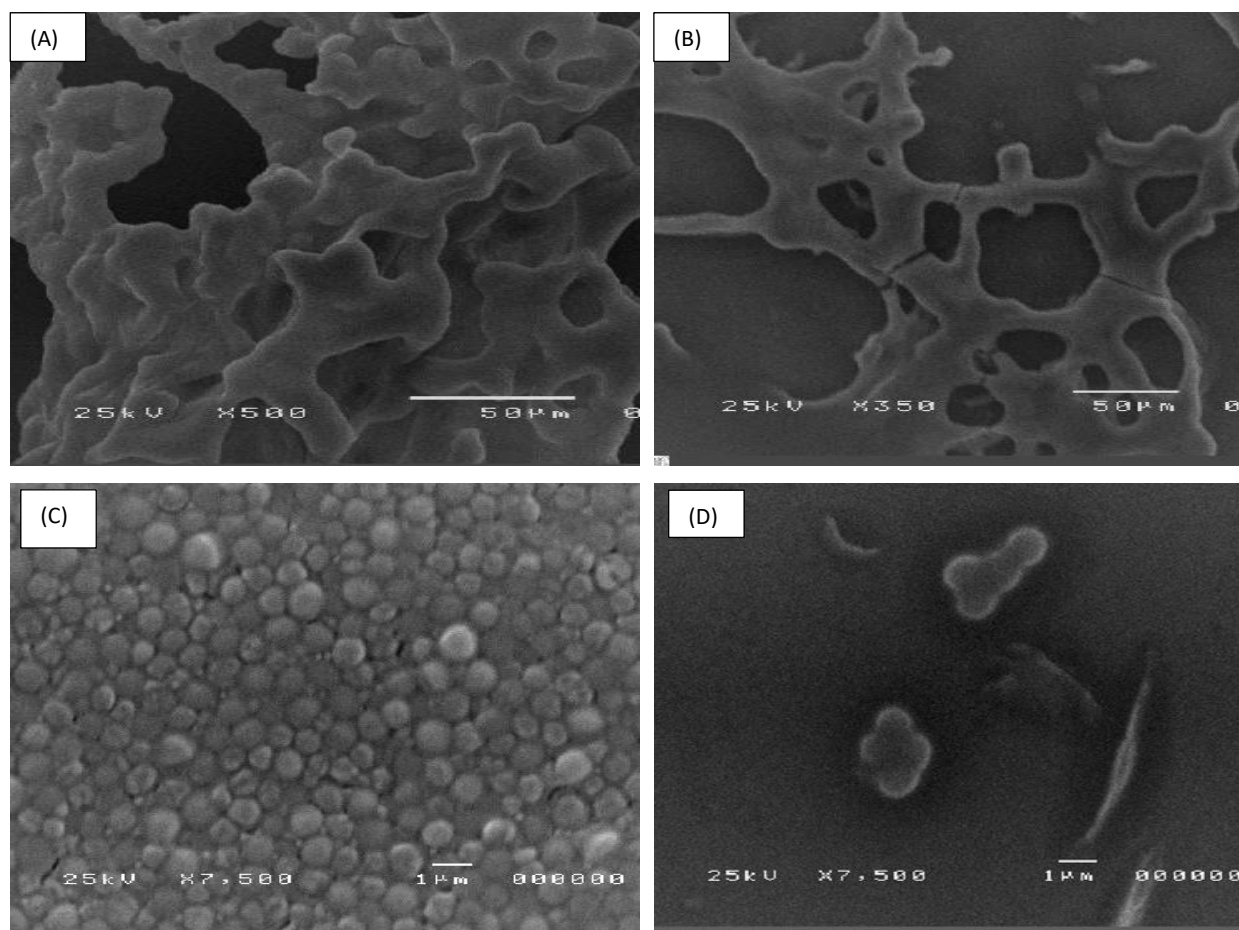

**Figure S4.** Scanning electron microscopy (SEM) of thyme EO antibiofilm activity showing A) *C. acnes* untreated biofilm, B) *C. acnes* biofilm treated with thyme, C) *S. epidermidis* untreated biofilm and D) *S. epidermidis* biofilm treated with thyme EO at a magnification of 5000x-7500x. Notice the reduction in cellular adhesion of both bacteria after treatment with thyme EO.

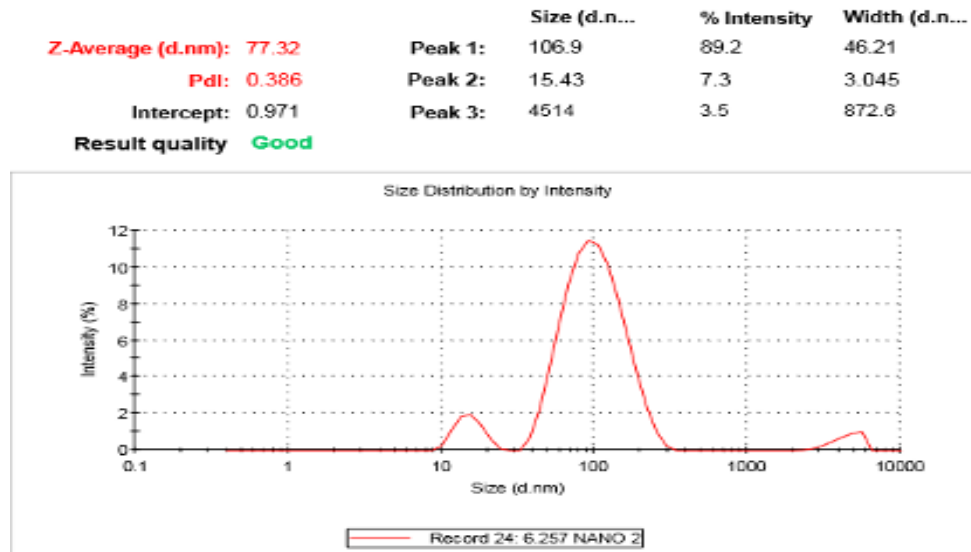

**Figure S5.** Size distribution by intensity of the developed thyme oil nanoemulsion

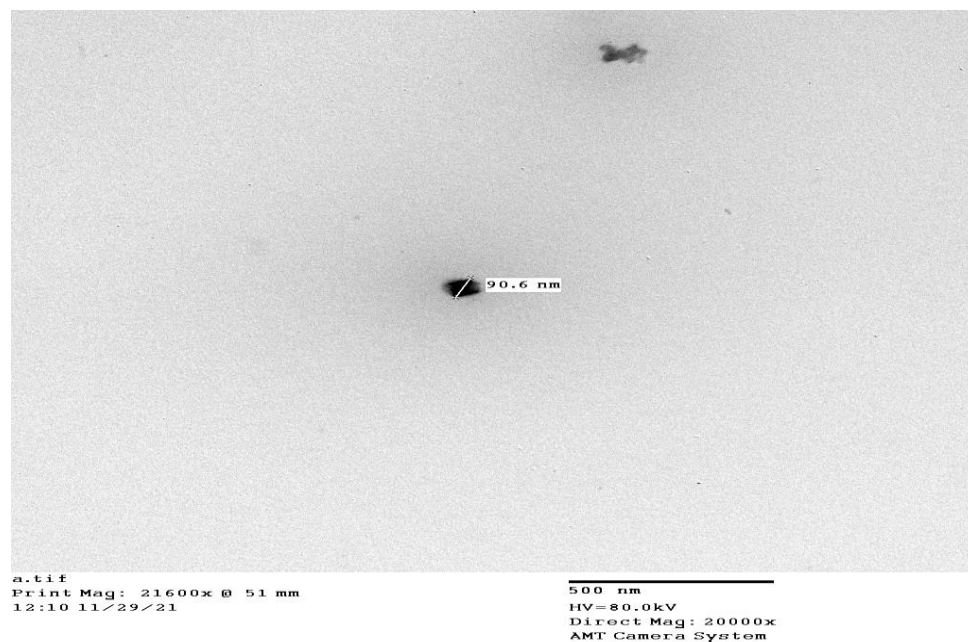

**Figure S6.** TEM image of the developed thyme oil nanoemulsion confirming that the formulation size is nano particle.
